# Supplementary material
Source: Springer Nature journal article supplement (https://www.springermedizin.de/resource/supplementary/12939_2012_307_MOESM2_ESM.pdf/9550750)

## A. Percentage of Late Stage Cancer Cases

### Breast

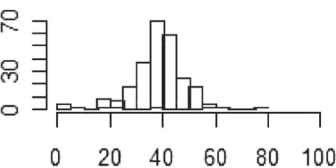

### Colorectal

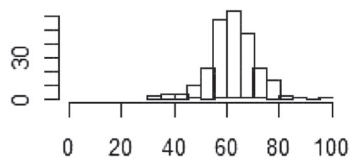

### Female Genetal

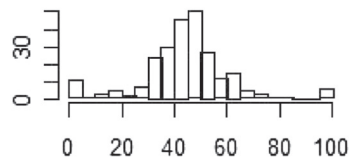

### Lung

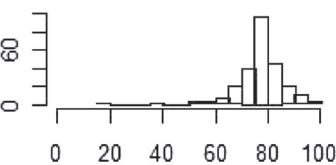

### Prostate

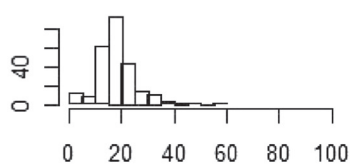

## B. Independent Variables

### Wellbeing Index

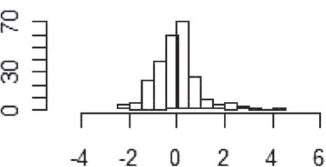

### Percent Uninsured

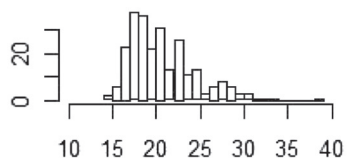

### Percent Obese

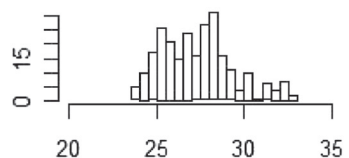

### Percent Hispanic

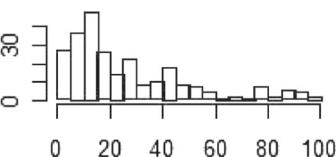

### Physician Supply per 1,000

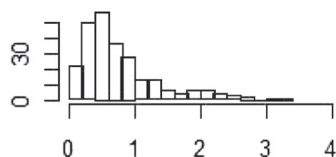

Supplement: MOESM2 [file 9550750]
